# Supplementary material for: The development of COPMAN-Air: A highly sensitive method for detecting SARS-CoV-2 in air
Source: Research Square preprint supplement (doi:10.21203/rs.3.rs-5995479/v1), 2025-02-18
Supplement: Supplementary file 1 [file b74803de736dfbefe8553db8.docx]

# Supplementary Information

## Title

The development of COPMAN-Air: A highly sensitive method for detecting SARS-CoV-2 in air

## Author information

Tomoyo Yoshinaga1, Yoshinori Ando1*, Yumi Sato1, Takeru Kishida2, and Masaaki Kitajima3

1 Shionogi & Co., Ltd., Osaka, Japan

2 Kishida Clinic, Fukuoka, Japan

3 Research Center for Water Environment Technology, School of Engineering, The University of Tokyo, Tokyo, Japan

*Corresponding author

Yoshinori Ando

E-mail: [yoshinori.ando@shionogi.co.jp](mailto:yoshinori.ando@shionogi.co.jp)

## **Supplementary Table S1. Detail information of air sampling and outpatients at the fever clinic**

| Sampling  date | Sampling  time  (hours) | Sampling  point | COVID-19  wave in Japan | Number of  diagnostic  tests | Number of  COVID-19  patients |
| --- | --- | --- | --- | --- | --- |
| 2022/7/23 | 4 | B | 5th wave | 10 | 7 |
| 3 | B | 5th wave | 3 | 1 |
| 2022/7/25 | 10 | A | 5th wave | 24 | 15 |
| 10 | B | 5th wave | 24 | 15 |
| 2022/7/26 | 10 | A | 5th wave | 23 | 18 |
| 10 | B | 5th wave | 23 | 18 |
| 2022/7/27 | 10 | A | 5th wave | 16 | 6 |
| 10 | B | 5th wave | 16 | 6 |
| 2022/9/3 | 3 | A | 5th wave | 3 | 0 |
| 3 | B | 5th wave | 3 | 0 |
| 3 | A | 5th wave | 4 | 1 |
| 3 | B | 5th wave | 4 | 1 |
| 2022/9/5 | 10 | A | 5th wave | 10 | 6 |
| 10 | B | 5th wave | 10 | 6 |
| 2022/9/7 | 10 | A | 5th wave | 15 | 5 |
| 10 | B | 5th wave | 15 | 5 |
| 2022/9/8 | 10 | A | 5th wave | 10 | 5 |
| 10 | B | 5th wave | 10 | 5 |
| 2022/9/9 | 10 | A | 5th wave | 3 | 0 |
| 10 | B | 5th wave | 3 | 0 |
| 2022/9/10 | 7.5 | A | 5th wave | 11 | 4 |
| 3 | B | 5th wave | 10 | 4 |
| 3 | B | 5th wave | 1 | 0 |
| 2023/3/11 | 2 | B | 6th wave | 0 | 0 |
| 2 | A | 6th wave | 0 | 0 |
| 2 | B | 6th wave | 0 | 0 |
| 2 | A | 6th wave | 0 | 0 |
| 2 | B | 6th wave | 0 | 0 |
| 2 | A | 6th wave | 0 | 0 |
| 2023/3/13 | 10 | B | 6th wave | 11 | 0 |
| 10 | A | 6th wave | 11 | 0 |
| 2023/3/14 | 10 | B | 6th wave | 5 | 0 |
| 10 | A | 6th wave | 5 | 0 |
| 2023/3/15 | 10 | B | 6th wave | 4 | 1 |
| 10 | A | 6th wave | 4 | 1 |
| 2023/3/16 | 10 | B | 6th wave | 7 | 1 |
| 10 | A | 6th wave | 7 | 1 |
| 2023/3/17 | 10 | B | 6th wave | 2 | 0 |
| 10 | A | 6th wave | 2 | 0 |
| 2023/3/18 | 10 | B | 6th wave | 3 | 0 |
| 10 | A | 6th wave | 3 | 0 |
| 2023/3/20 | 10 | B | 6th wave | 9 | 3 |
| 10 | A | 6th wave | 9 | 3 |
| 2023/3/22 | 10 | B | 6th wave | 10 | 0 |
| 10 | A | 6th wave | 10 | 0 |
| 2023/3/23 | 10 | B | 6th wave | 7 | 2 |
| 10 | A | 6th wave | 7 | 2 |
| 2023/3/24 | 10 | B | 6th wave | 4 | 0 |
| 10 | A | 6th wave | 4 | 0 |
| 2023/3/25 | 5 | B | 6th wave | 0 | 0 |
| 5 | A | 6th wave | 0 | 0 |
| 4 | B | 6th wave | 4 | 1 |
| 4 | A | 6th wave | 4 | 1 |
| 2023/7/24 | 4 | B | 7th wave | 25 | 19 |
| 4 | A | 7th wave | 25 | 19 |
| 4 | B | 7th wave | 9 | 4 |
| 4 | A | 7th wave | 9 | 4 |
| 2023/7/25 | 10 | B | 7th wave | 19 | 13 |
| 10 | A | 7th wave | 19 | 13 |
| 2023/7/26 | 10 | B | 7th wave | 30 | 19 |
| 10 | A | 7th wave | 30 | 19 |
| 2023/7/27 | 10 | B | 7th wave | 21 | 12 |
| 10 | A | 7th wave | 21 | 12 |
| 2023/7/28 | 10 | B | 7th wave | 20 | 11 |
| 10 | A | 7th wave | 20 | 11 |
| 2023/7/29 | 10 | B | 7th wave | 25 | 14 |
| 10 | A | 7th wave | 25 | 14 |
| 2023/7/31 | 10 | B | 7th wave | 34 | 21 |
| 10 | B | 7th wave | 34 | 21 |
| 2023/8/1 | 10 | B | 7th wave | 17 | 7 |
| 10 | A | 7th wave | 17 | 7 |
| 2023/8/2 | 10 | B | 7th wave | 22 | 13 |
| 10 | A | 7th wave | 22 | 13 |
| 2023/8/3 | 10 | B | 7th wave | 29 | 9 |
| 10 | A | 7th wave | 29 | 9 |
| 2023/8/4 | 10 | B | 7th wave | 20 | 11 |
| 10 | A | 7th wave | 20 | 11 |
| 2023/8/5 | 10 | B | 7th wave | 23 | 4 |
| 10 | A | 7th wave | 23 | 4 |
| 2023/8/7 | 10 | B | 7th wave | 21 | 16 |
| 10 | A | 7th wave | 21 | 16 |
| 2023/8/8 | 10 | B | 7th wave | 20 | 6 |
| 10 | A | 7th wave | 20 | 6 |
| 2023/8/9 | 6.5 | B | 7th wave | 13 | 5 |
| 6.5 | A | 7th wave | 13 | 5 |
| 2023/8/10 | 8 | B | 7th wave | 15 | 8 |
| 8 | A | 7th wave | 15 | 8 |
| 2023/8/16 | 6.5 | B | 7th wave | 20 | 11 |
| 6.5 | A | 7th wave | 20 | 11 |
| 2023/8/17 | 10 | B | 7th wave | 25 | 9 |
| 10 | A | 7th wave | 25 | 9 |
| 2023/8/18 | 10 | B | 7th wave | 19 | 12 |
| 10 | A | 7th wave | 19 | 12 |
| 2023/8/19 | 10 | B | 7th wave | 22 | 7 |
| 10 | A | 7th wave | 22 | 7 |
| 2023/8/21 | 10 | B | 7th wave | 34 | 18 |
| 10 | A | 7th wave | 34 | 18 |
| 2023/8/22 | 10 | B | 7th wave | 20 | 8 |
| 10 | A | 7th wave | 20 | 8 |
| 2023/8/23 | 10 | B | 7th wave | 32 | 11 |
| 10 | A | 7th wave | 32 | 11 |
| 2023/8/24 | 10 | B | 7th wave | 23 | 8 |
| 10 | A | 7th wave | 23 | 8 |
| 2023/8/25 | 10 | B | 7th wave | 17 | 6 |
| 10 | A | 7th wave | 17 | 6 |
| 2023/8/26 | 10 | A | 7th wave | 15 | 6 |
